# Supplementary material for: Characterization of cell states in biliary tract cancers identifies mechanisms of therapeutic resistance in a phase II trial of DKN-01/nivolumab
Source: PubMed Central journal article supplement (PMC11483019; doi:10.1101/2024.10.08.24315092), 2024-10-08
Supplement: media-1.pdf [file media-1.pdf]

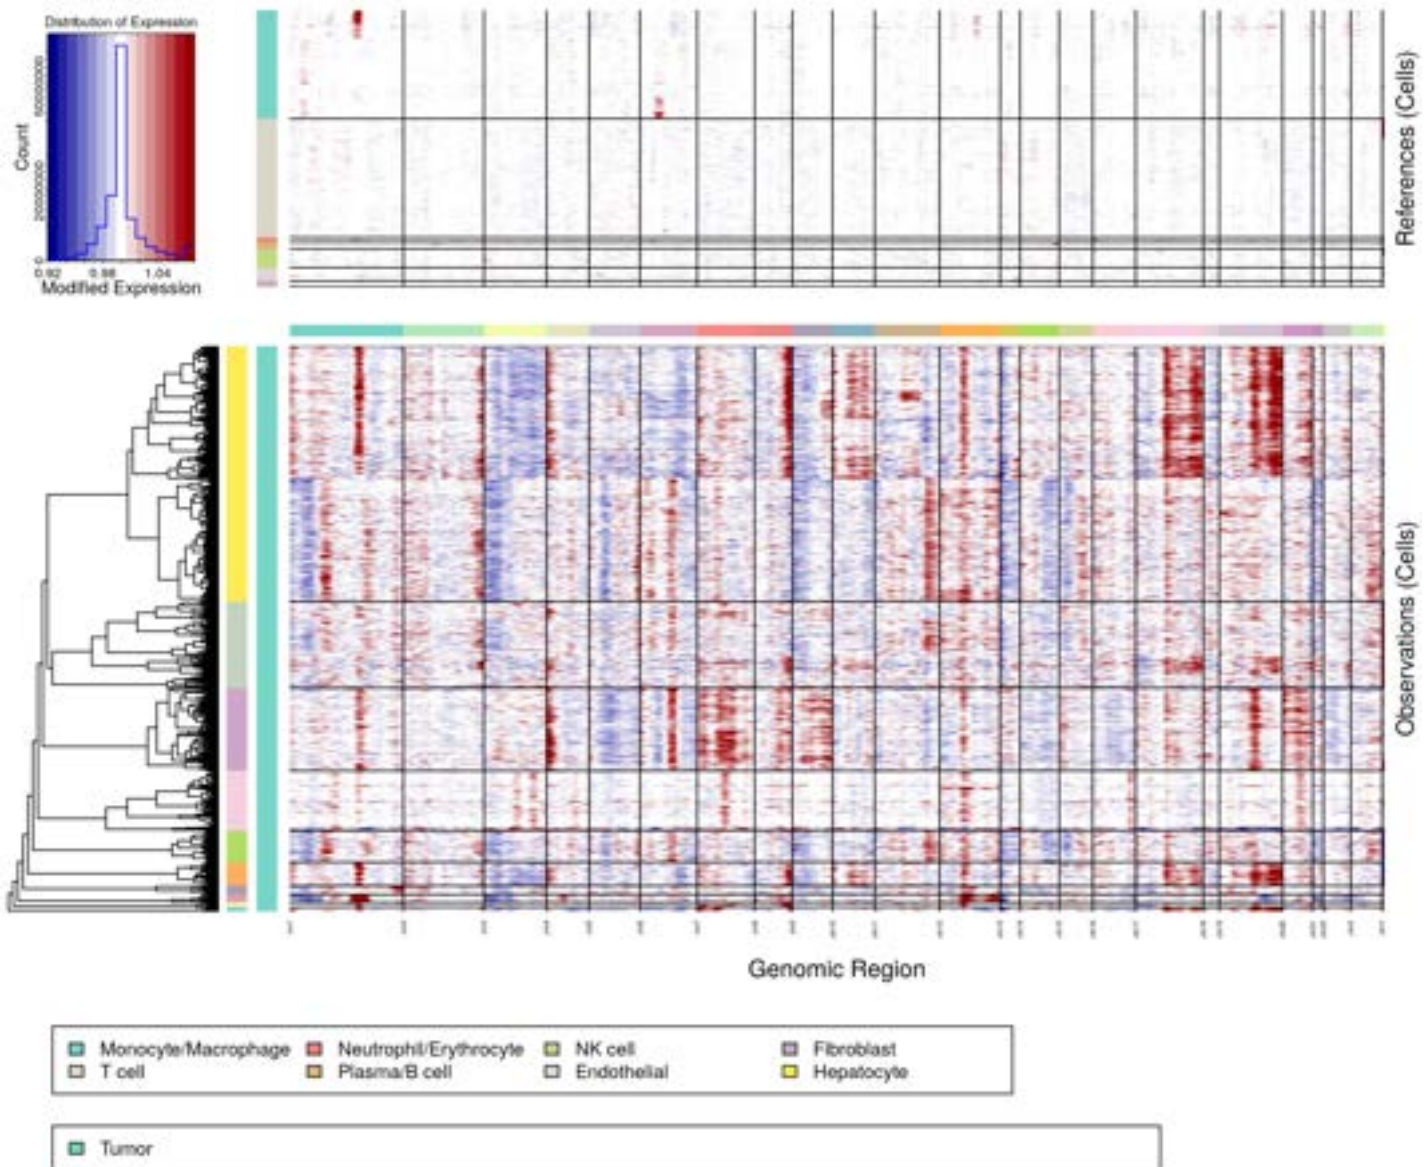

Figure S1

**A**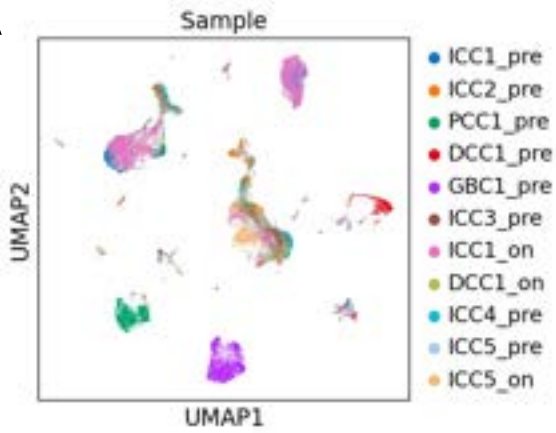**B**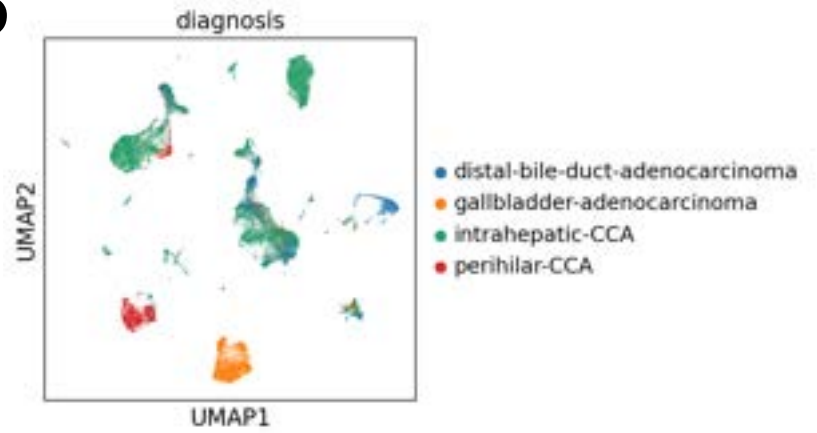**C**

### Cell type proportions across all samples

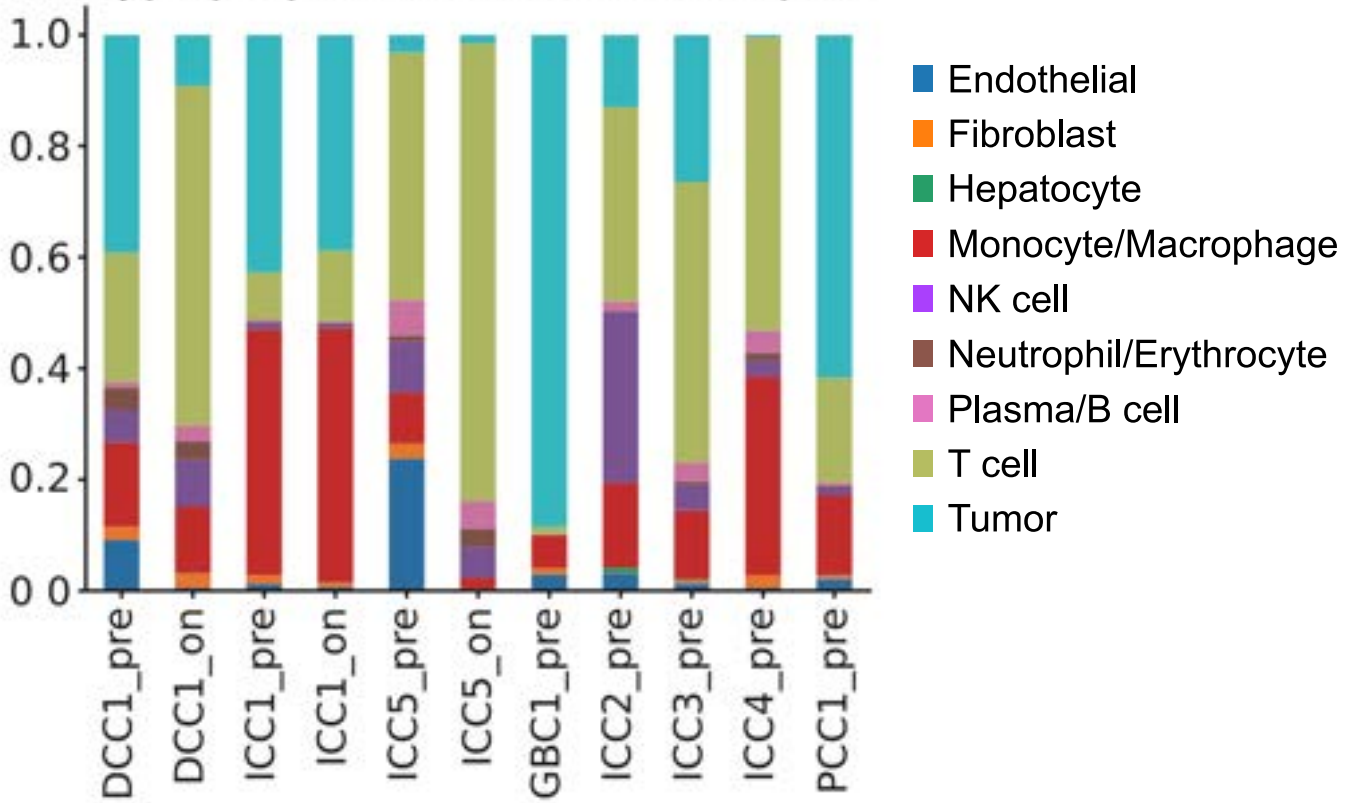

**A**

| Cluster                | DKK1-  | DKK1+ | % positive |
|------------------------|--------|-------|------------|
| Tumor                  | 18,299 | 811   | 4%         |
| T cell                 | 12,952 | 9     | < 0.1%     |
| Mono/Mac               | 11,827 | 50    | 0.4%       |
| NK cell                | 2,056  | 1     | < 0.1%     |
| Endothelial            | 1,460  | 1     | < 0.1%     |
| Plasma/B               | 729    | 0     | < 0.1%     |
| Fibroblast             | 616    | 10    | 1.6%       |
| Neutrophil/erythrocyte | 514    | 1     | 0.2%       |
| Hepatocyte             | 44     | 0     | < 0.1%     |

**B**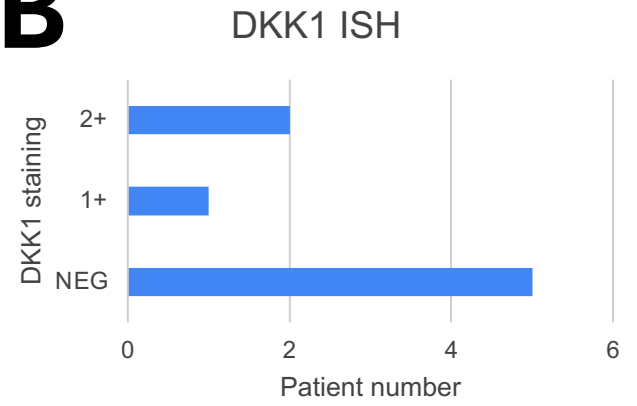**C**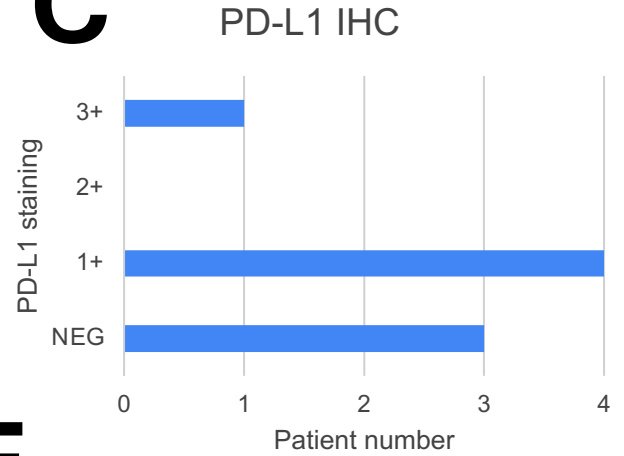**D**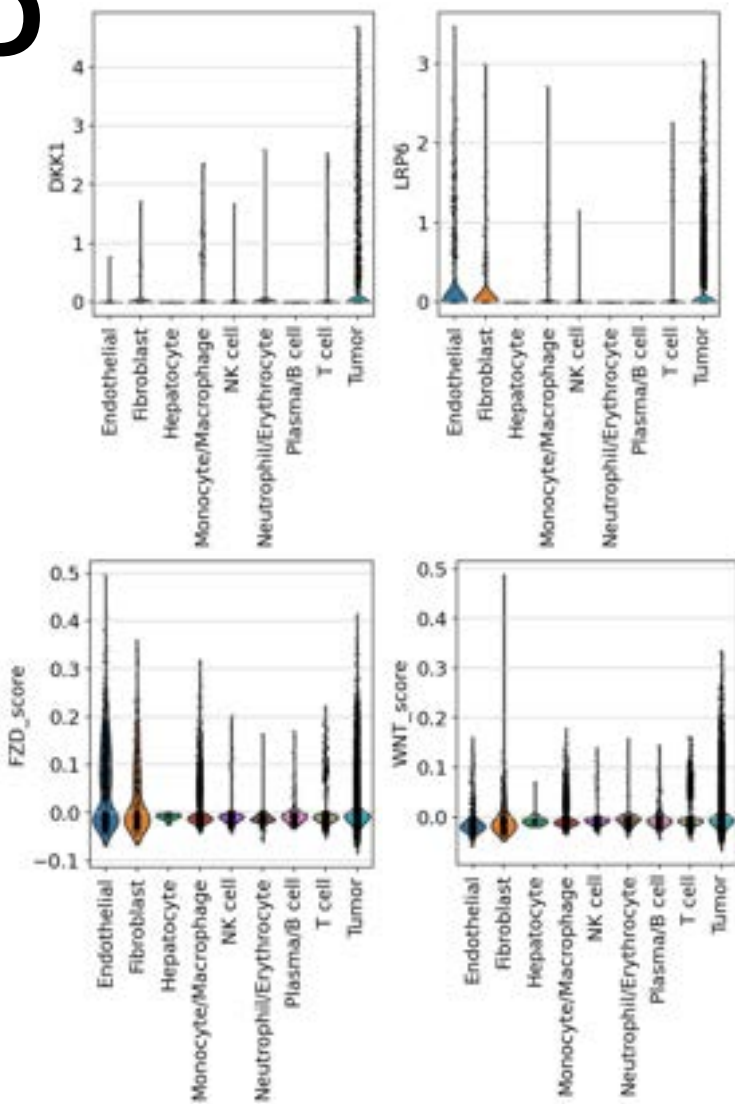**E**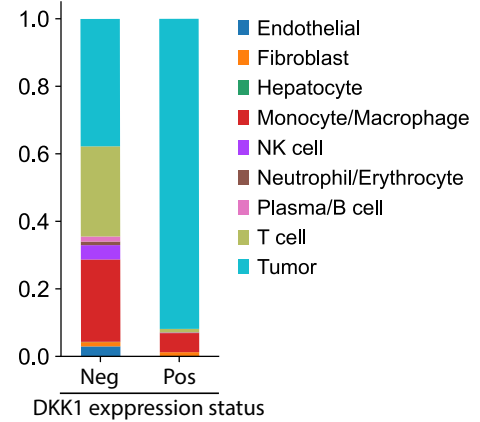**F**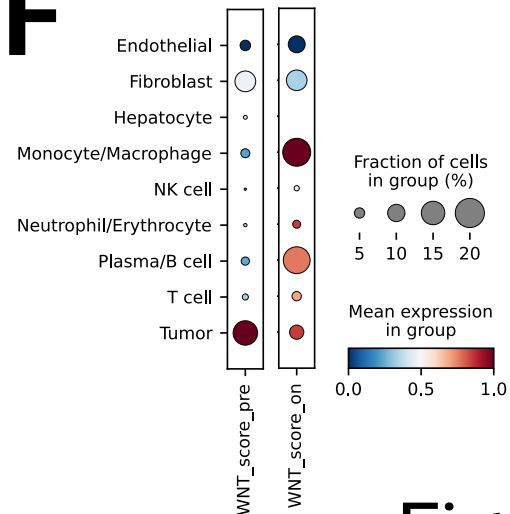

Figure S3

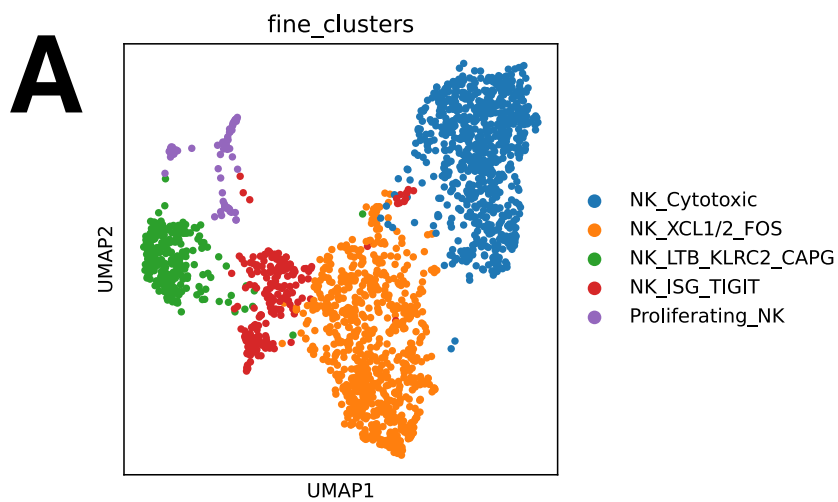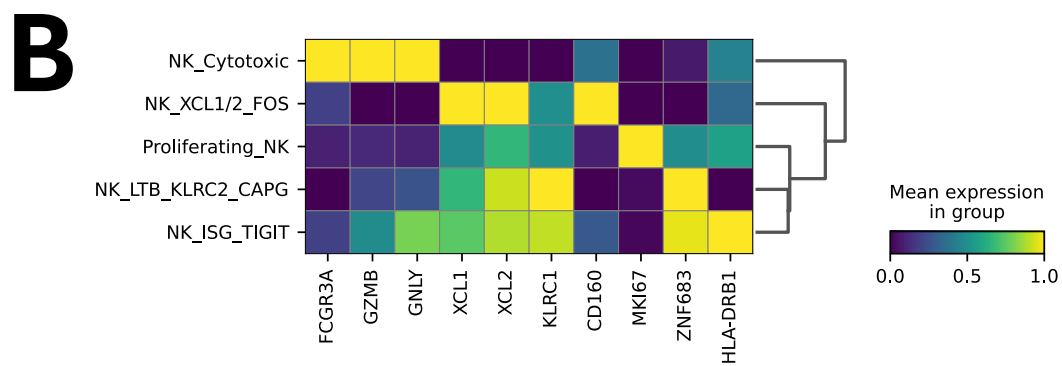

Figure S4



**A**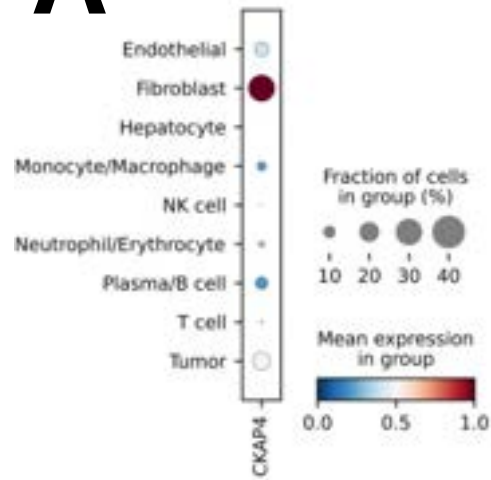**B**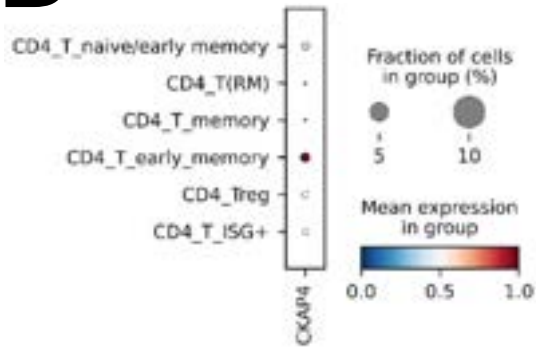**C**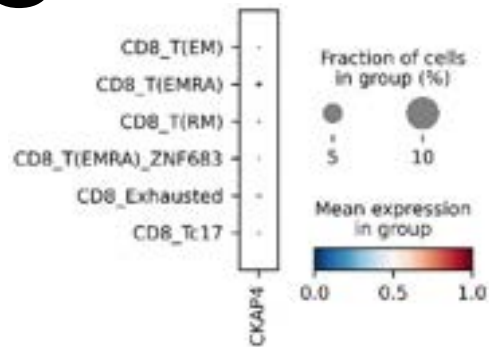**D**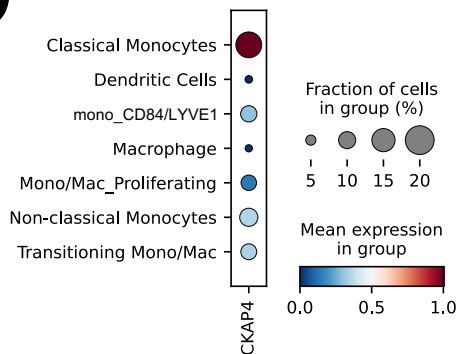**E**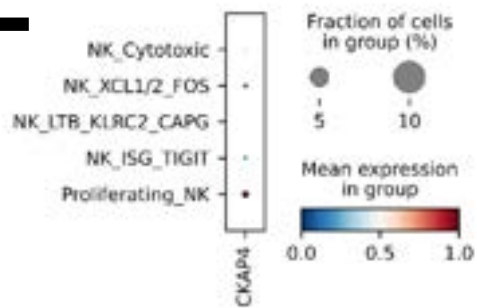

Figure S5

**A**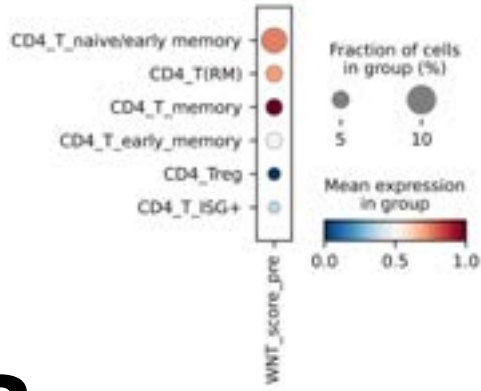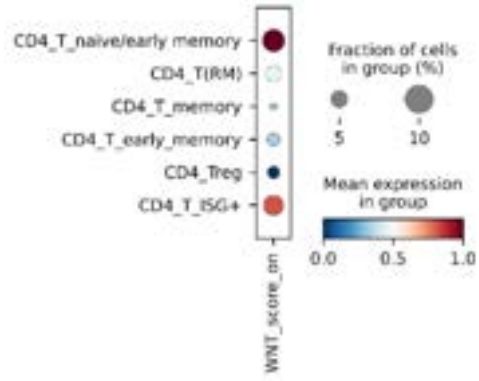**B**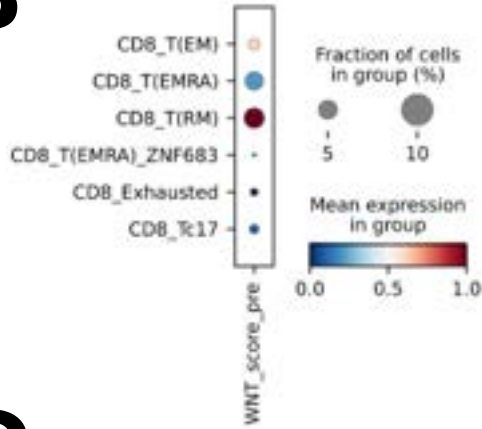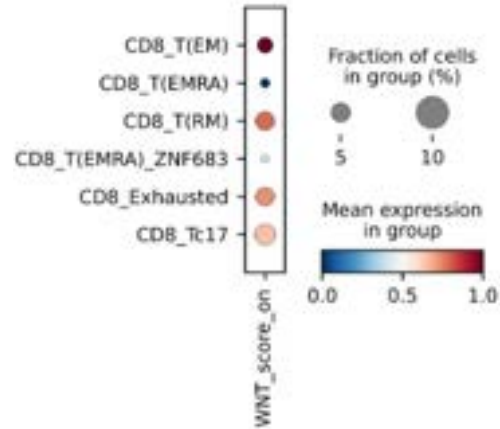**C**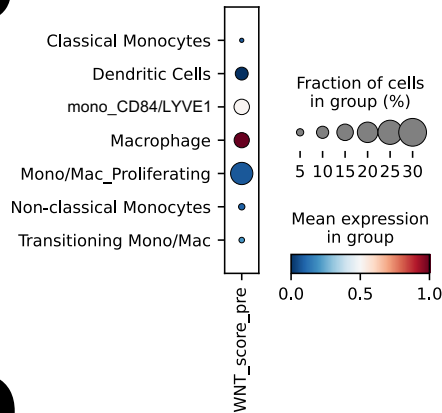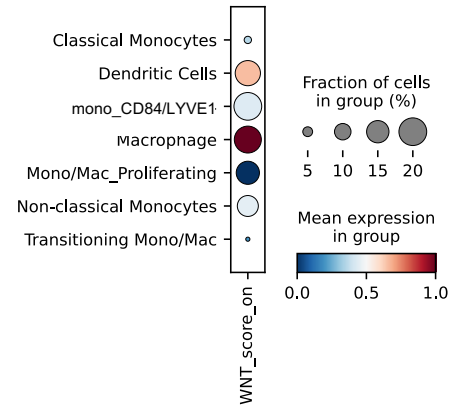**D**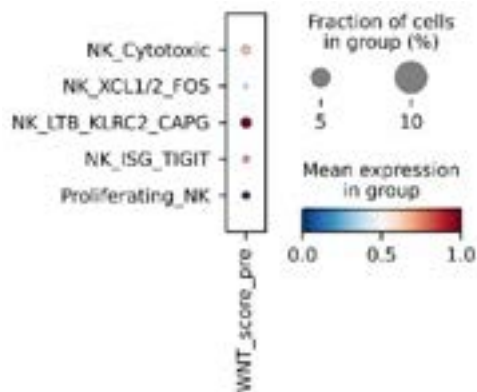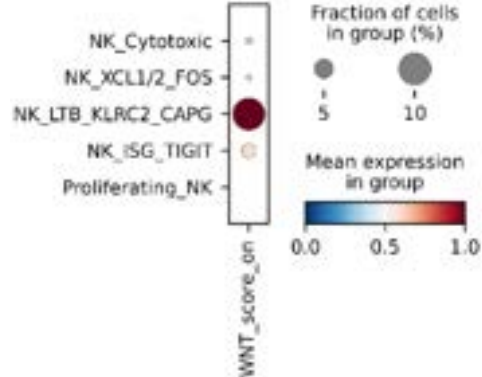

Figure S6

**A**

## T cells cNMF program usages by T cell subset

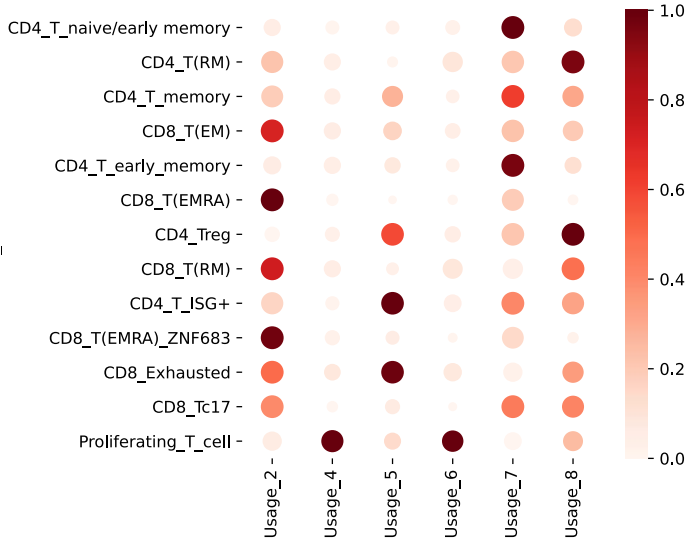**B**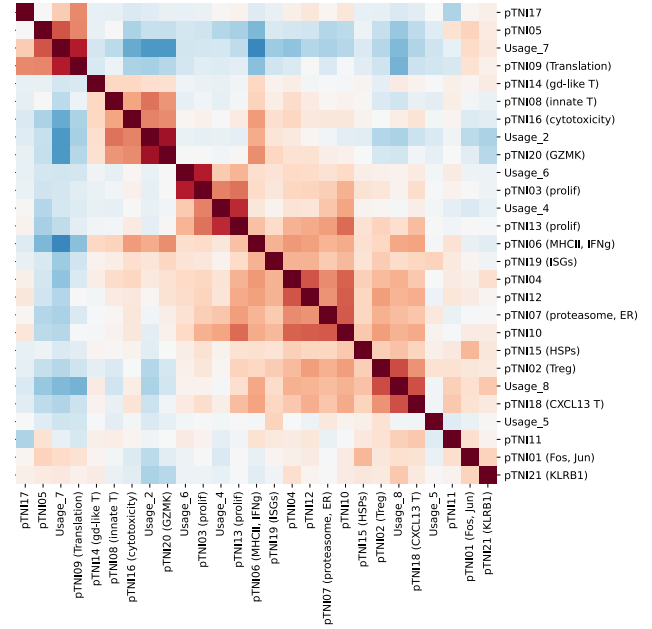**C****CD4****CD8**

## Usage\_2: GZMK/memory/resident memory

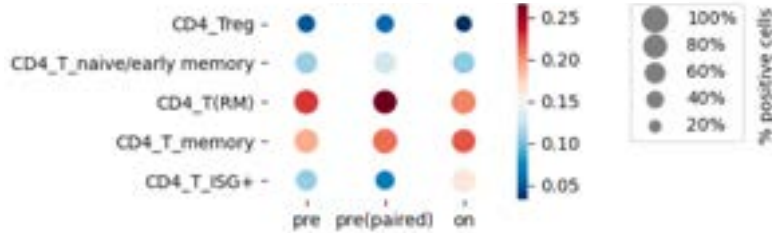

## Usage\_2: GZMK/memory/resident memory

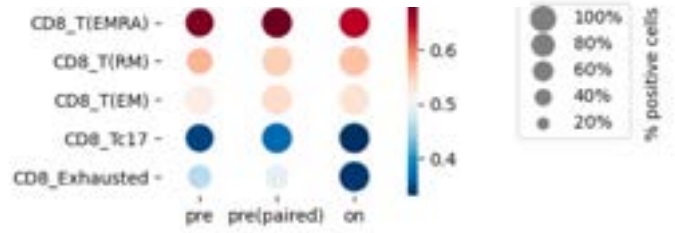

## Usage\_4: proliferation

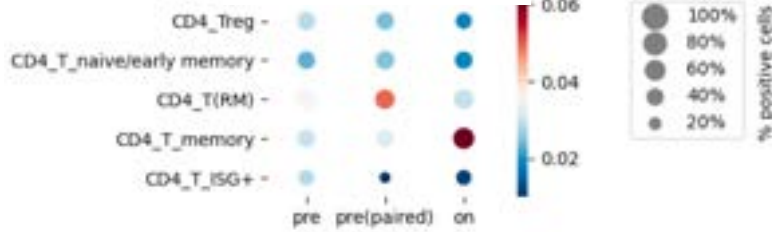

## Usage\_4: proliferation

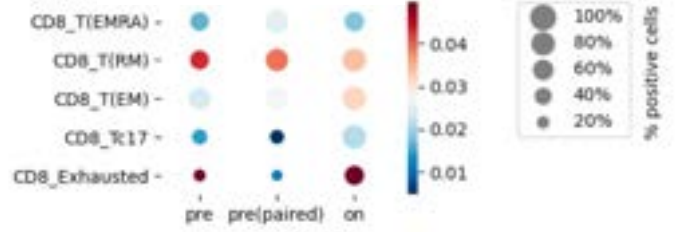

## Usage\_6: proliferation

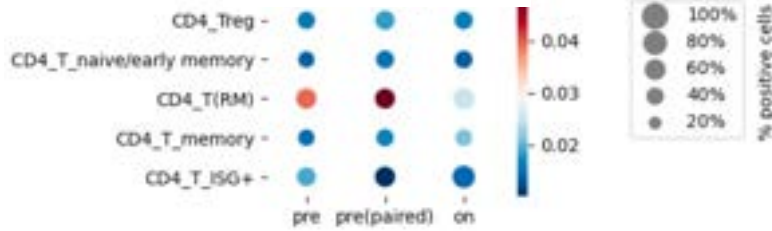

## Usage\_6: proliferation

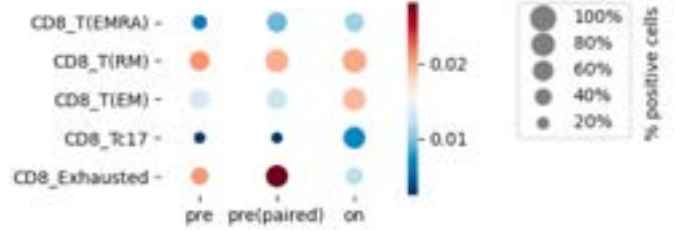

## Usage\_8: Treg, CXCL13+ CD8 T cell

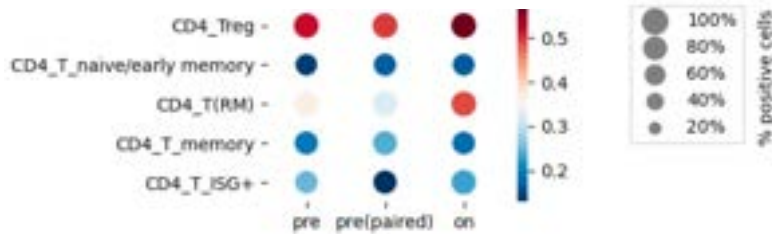

## Usage\_8: Treg, CXCL13+ CD8 T cell

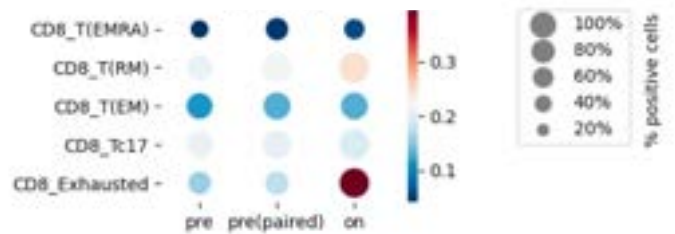

# A Myeloid cNMF program usages by myeloid subset

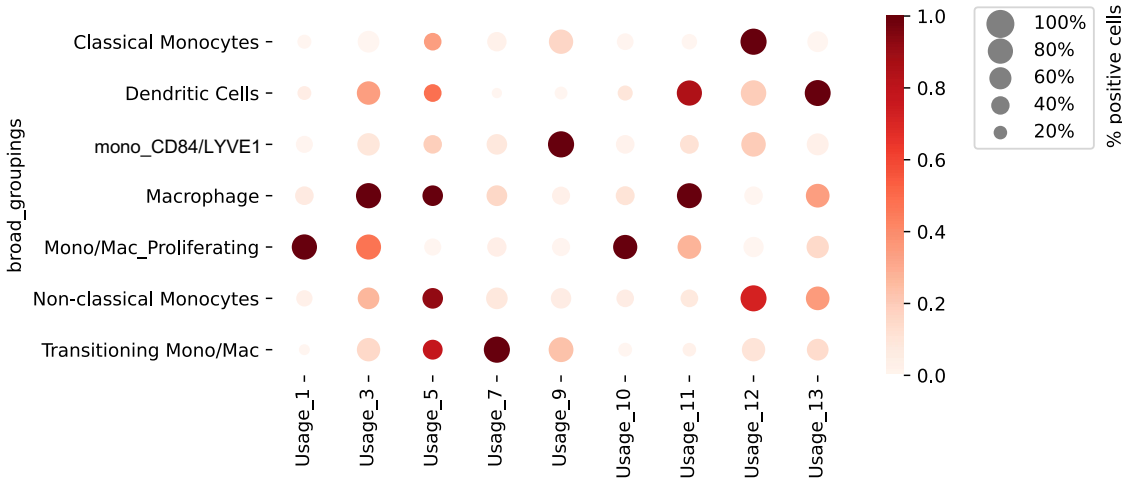

# B

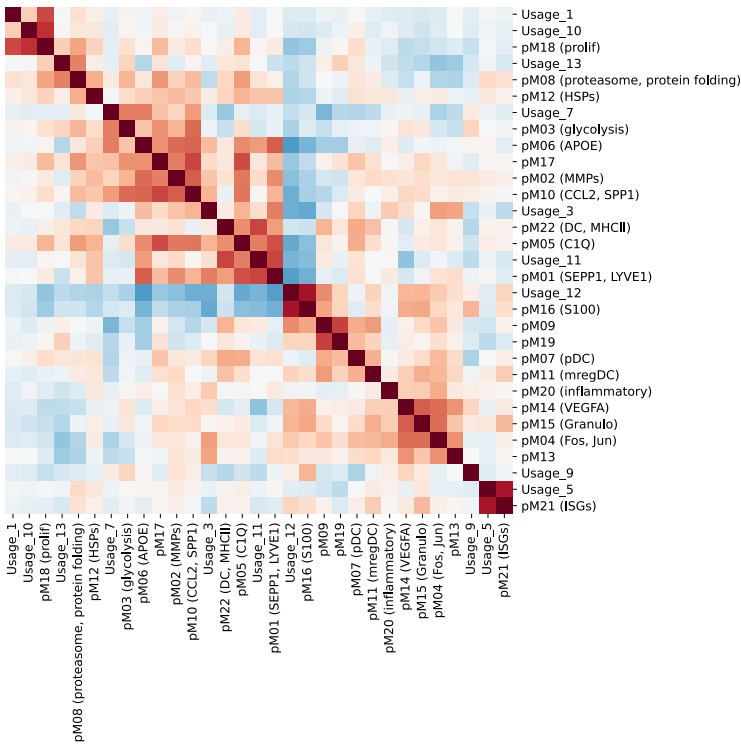

# C

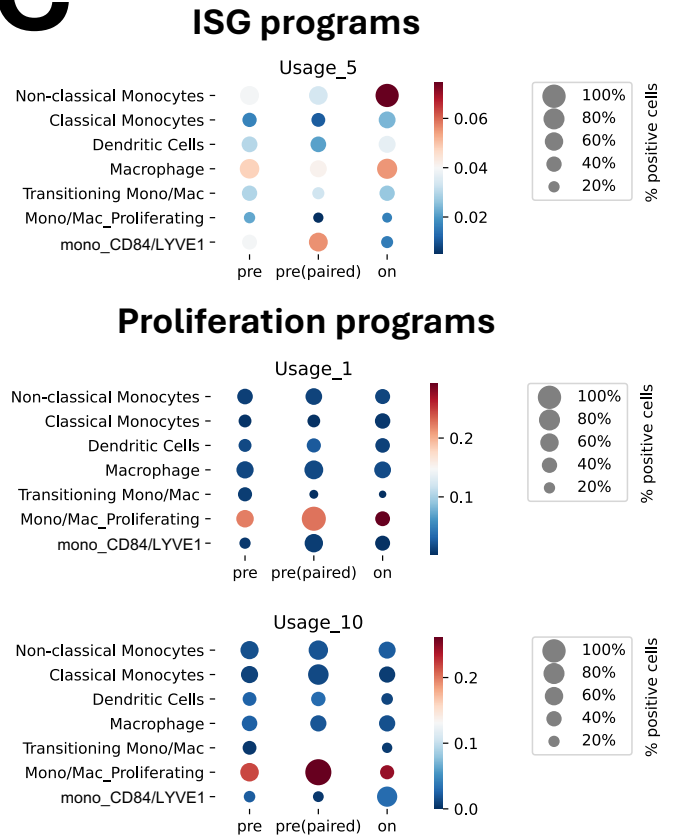

Figure S8

**A**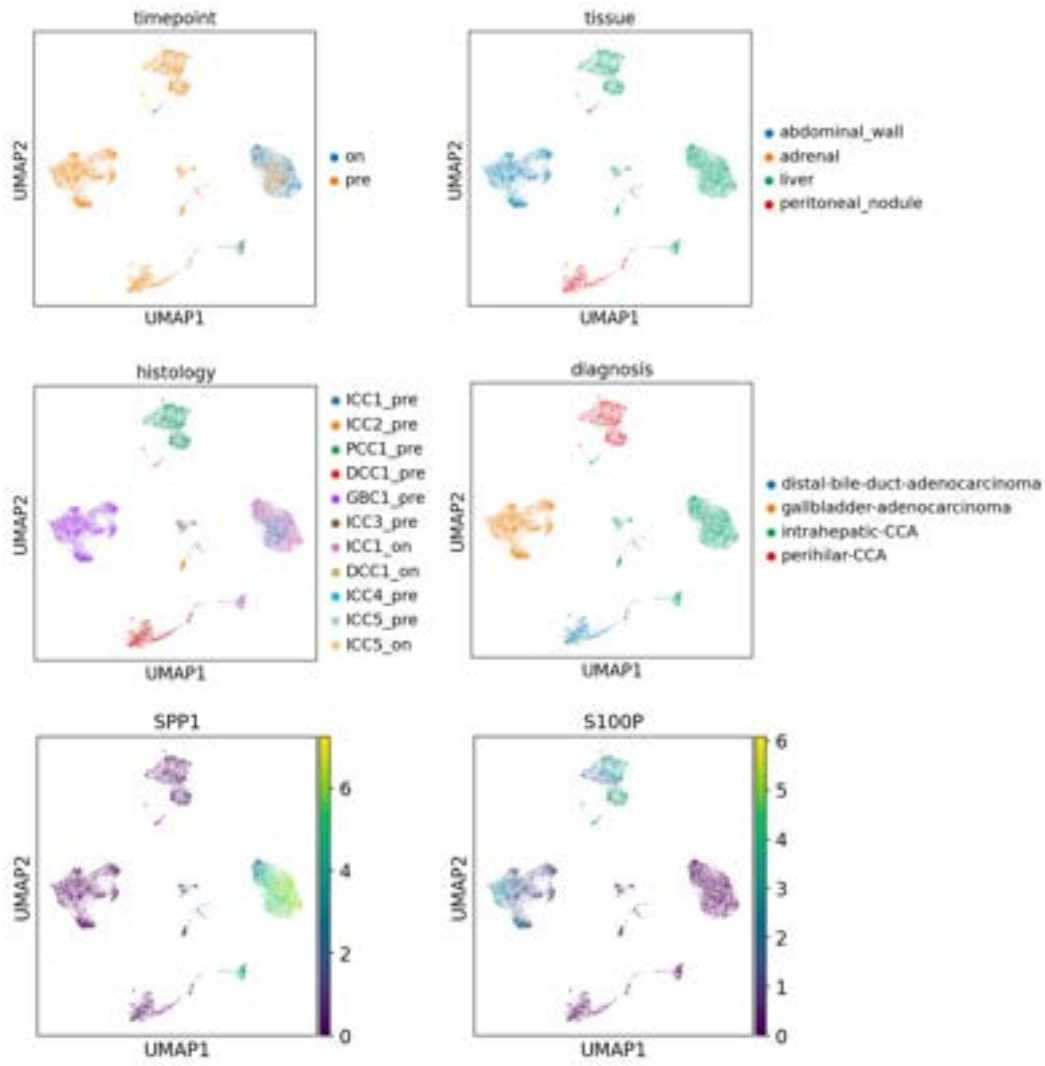**B**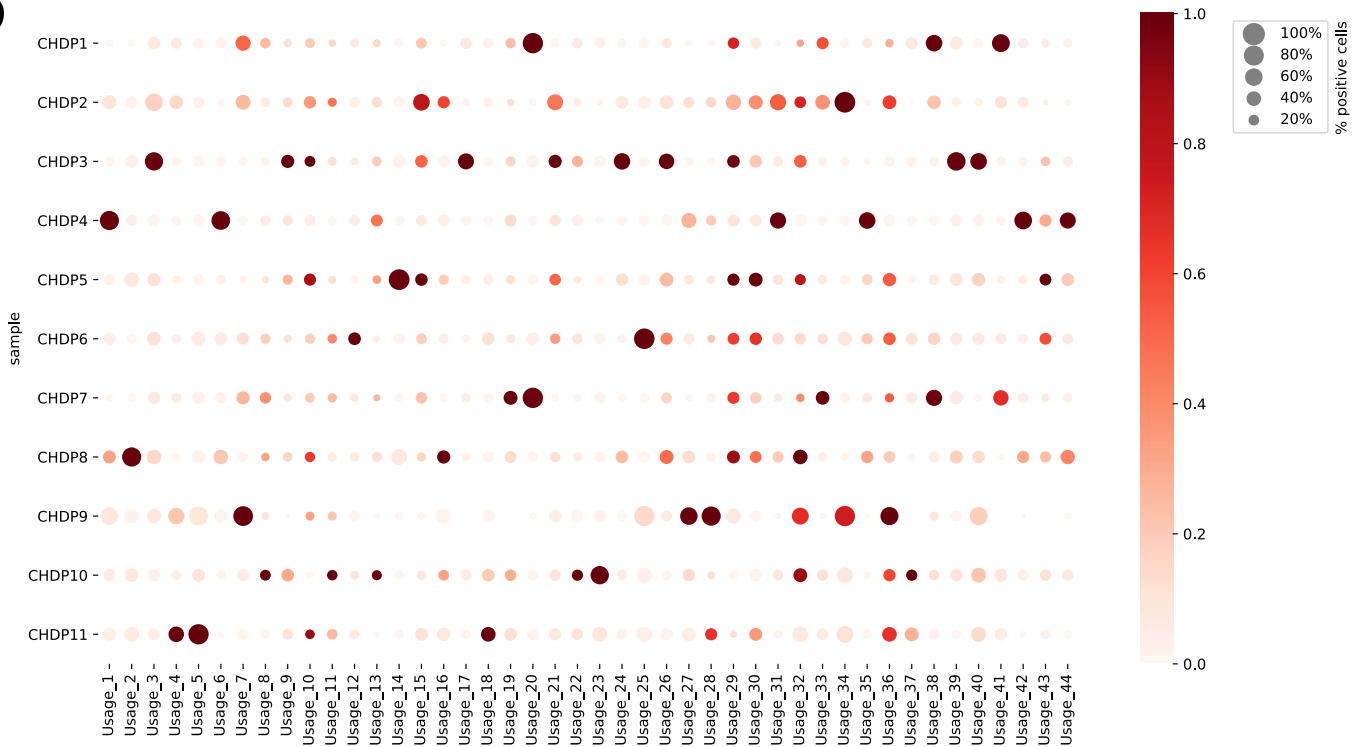**Figure S9**



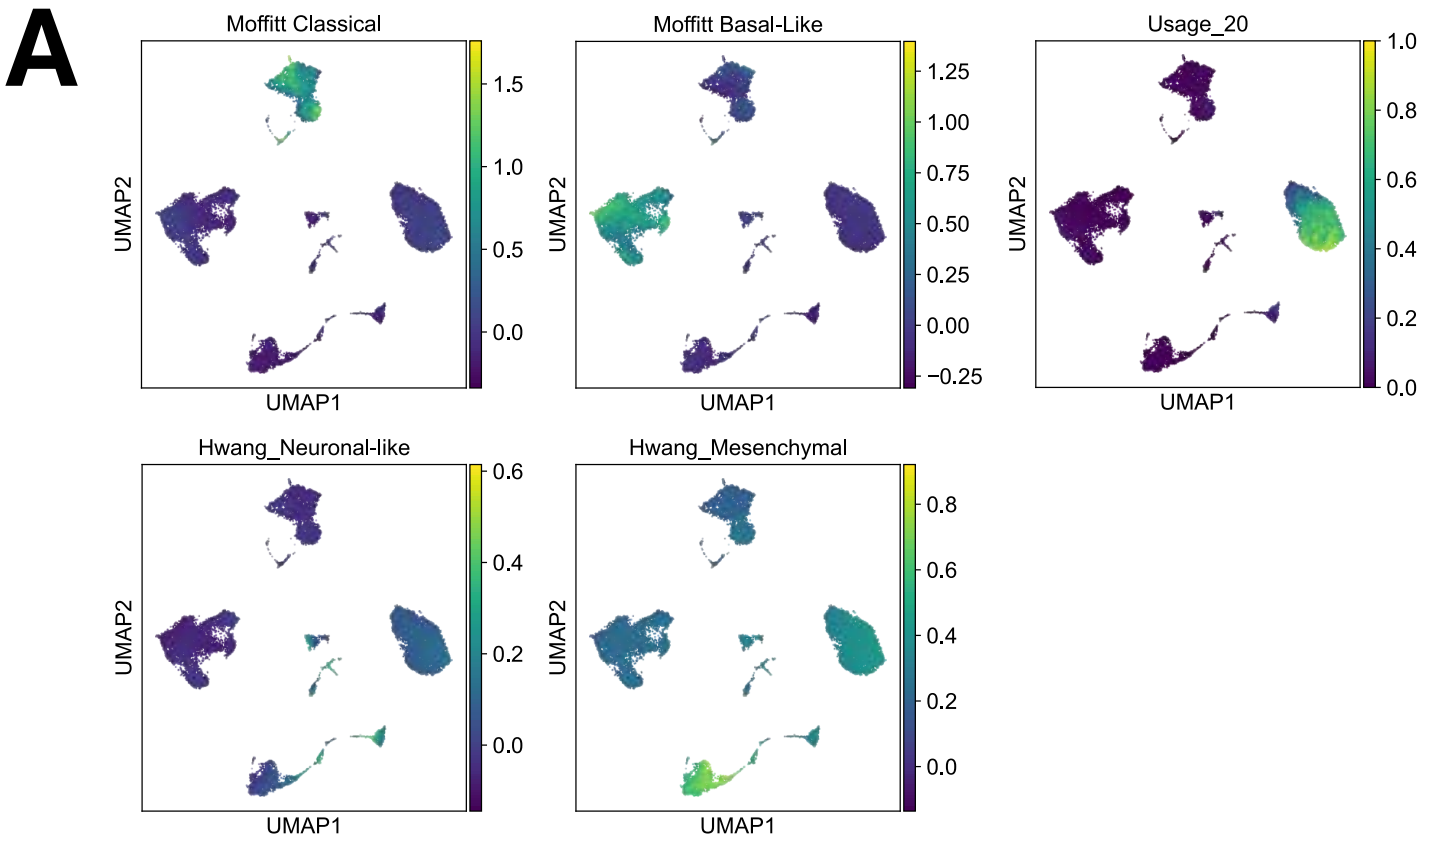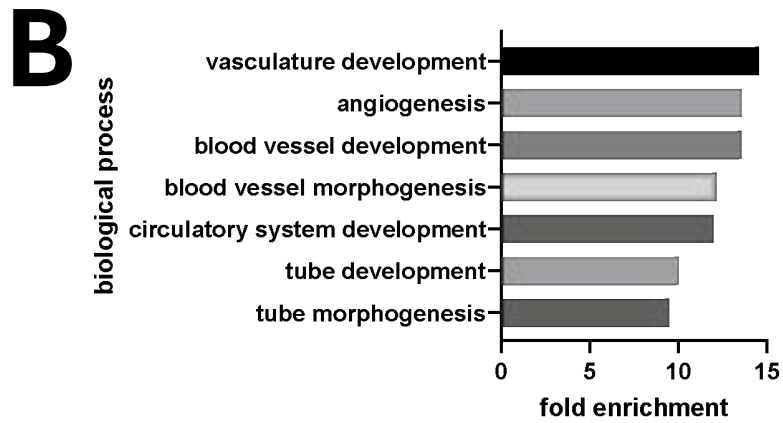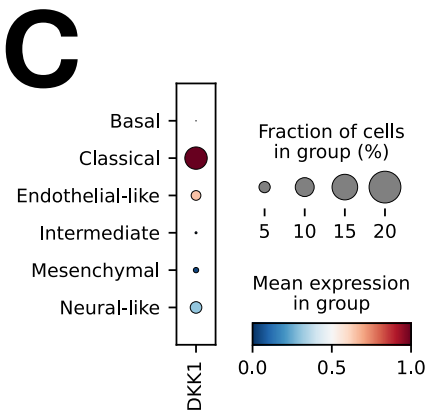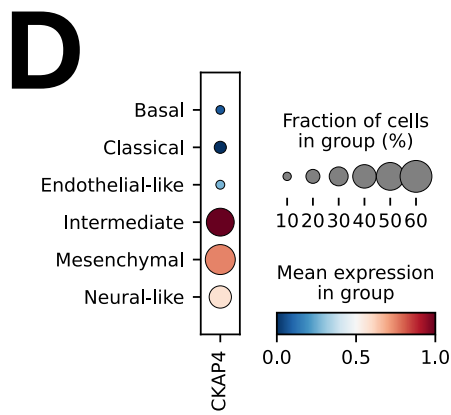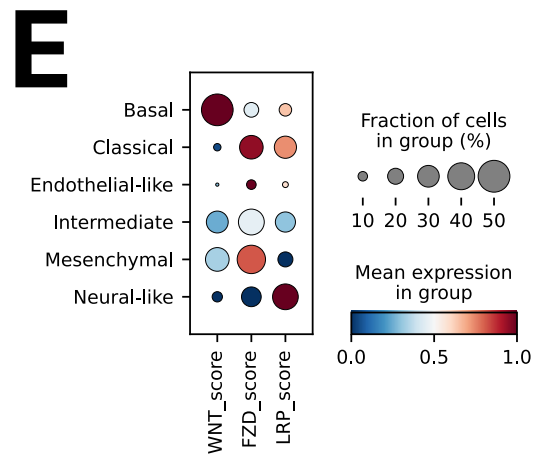

Figure S10

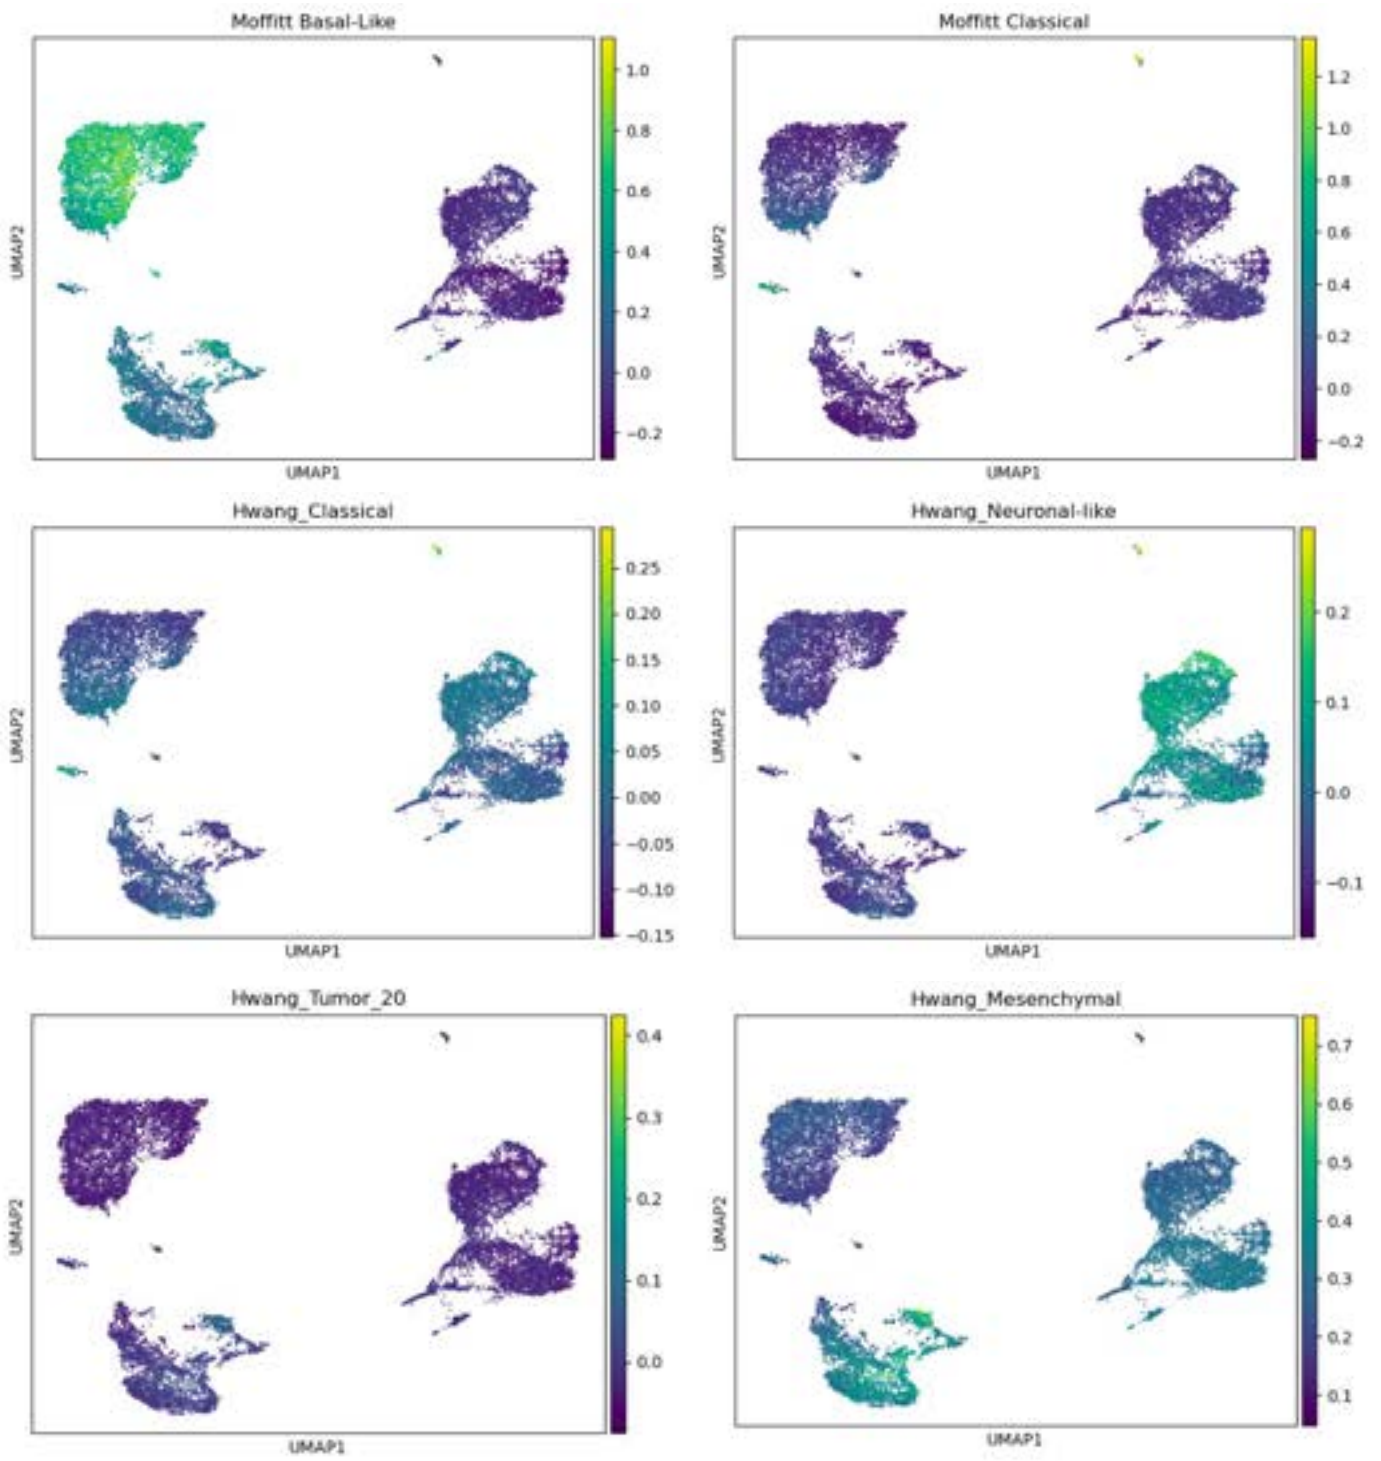

Figure S11

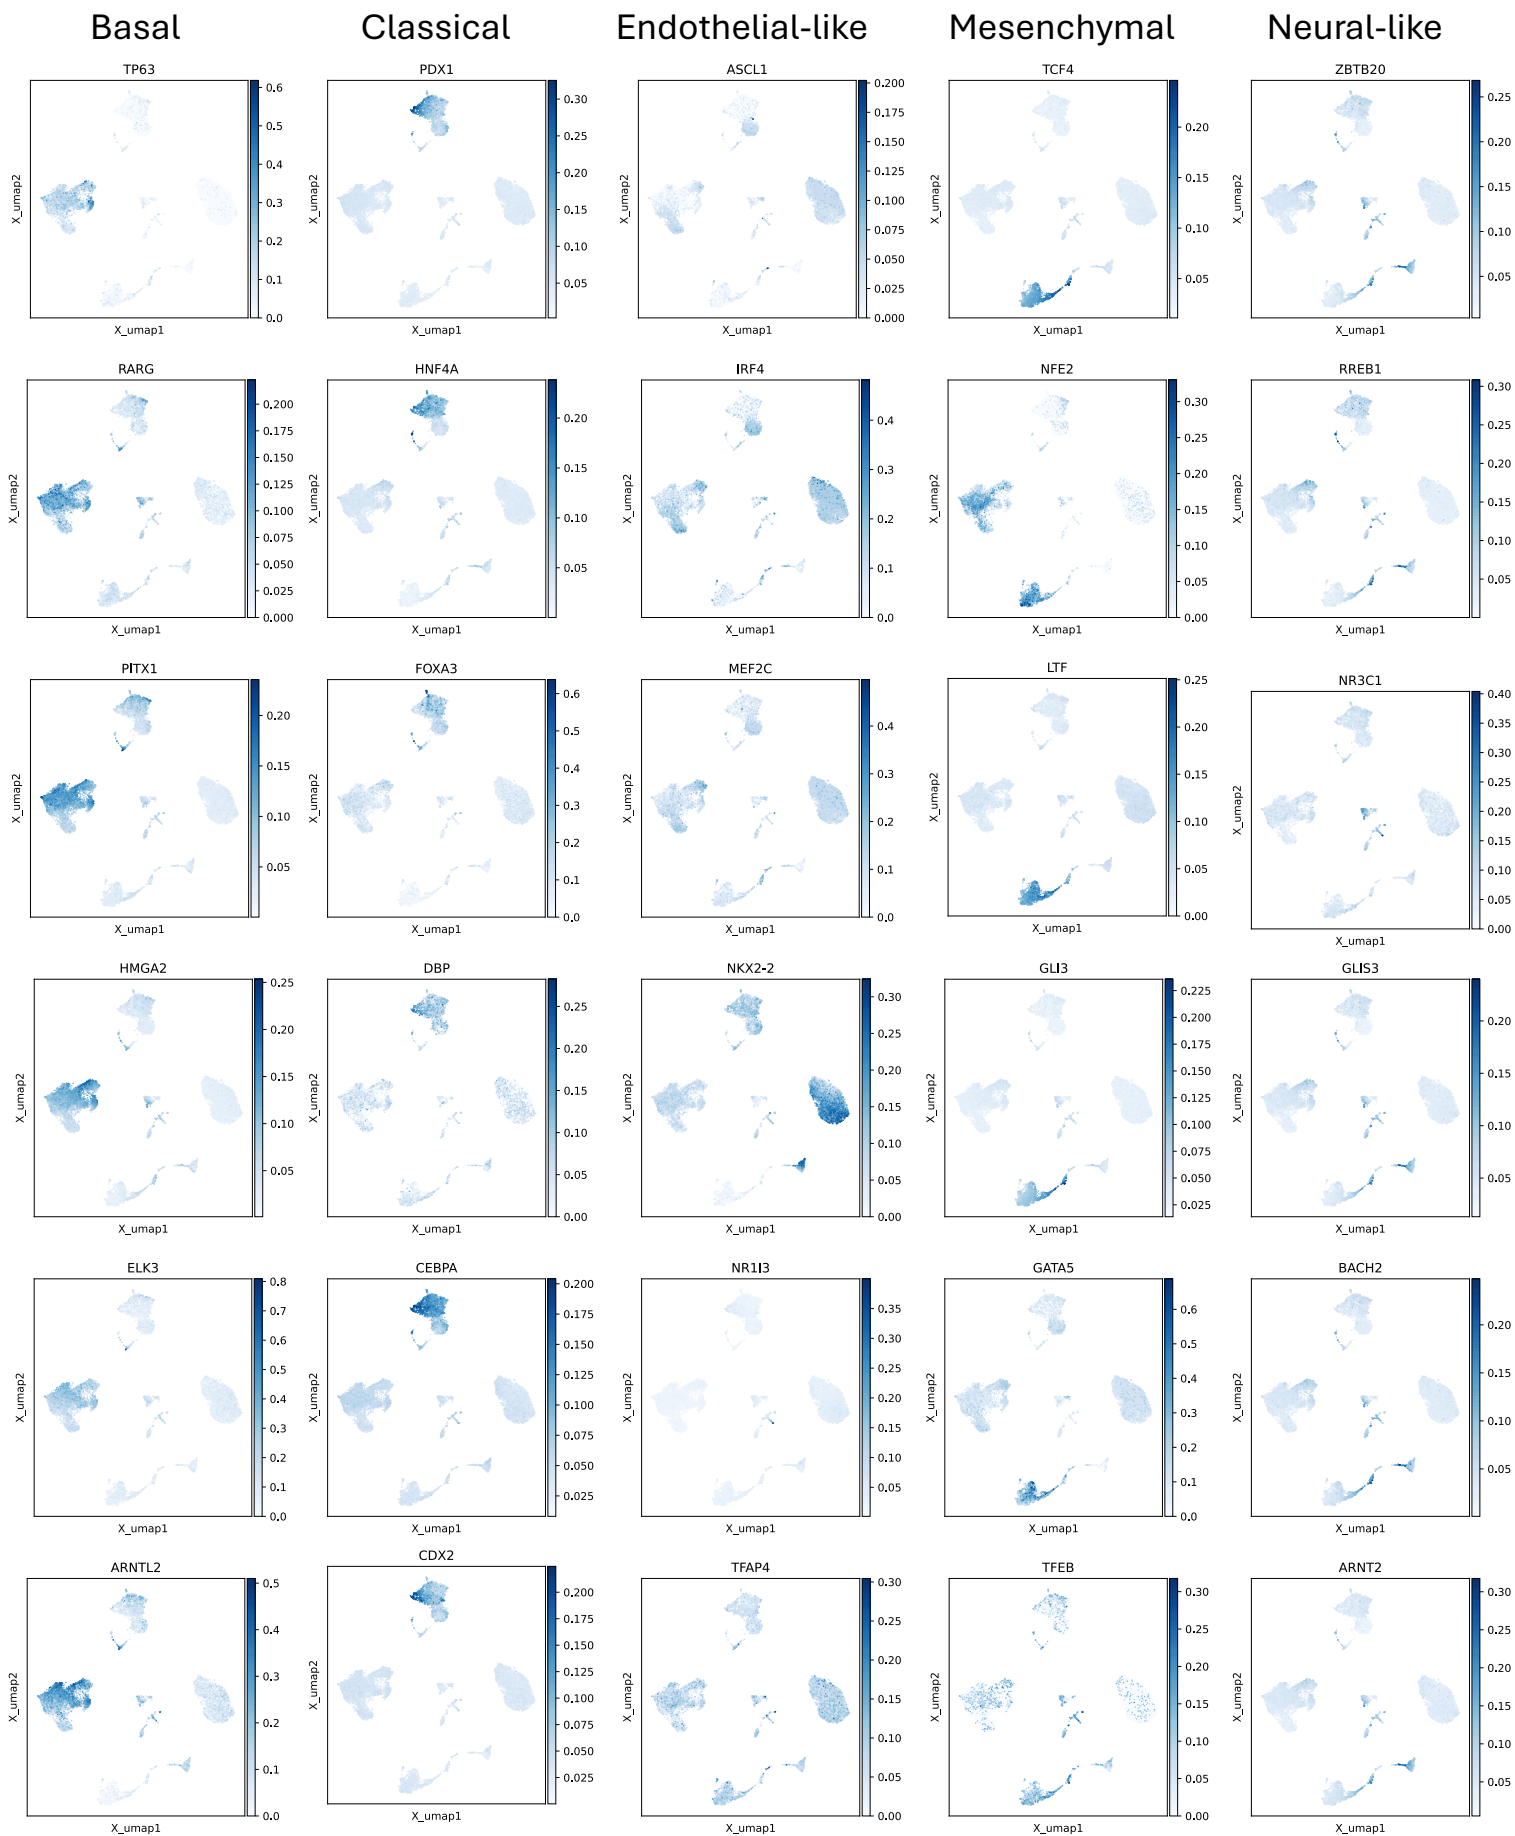

Figure S12
